# Supplementary material
Source: Springer Nature journal article supplement (https://www.springermedizin.de/resource/supplementary/12889_2010_2440_MOESM2_ESM.pdf/9485860)
Supplement: MOESM2 [file 9485860]

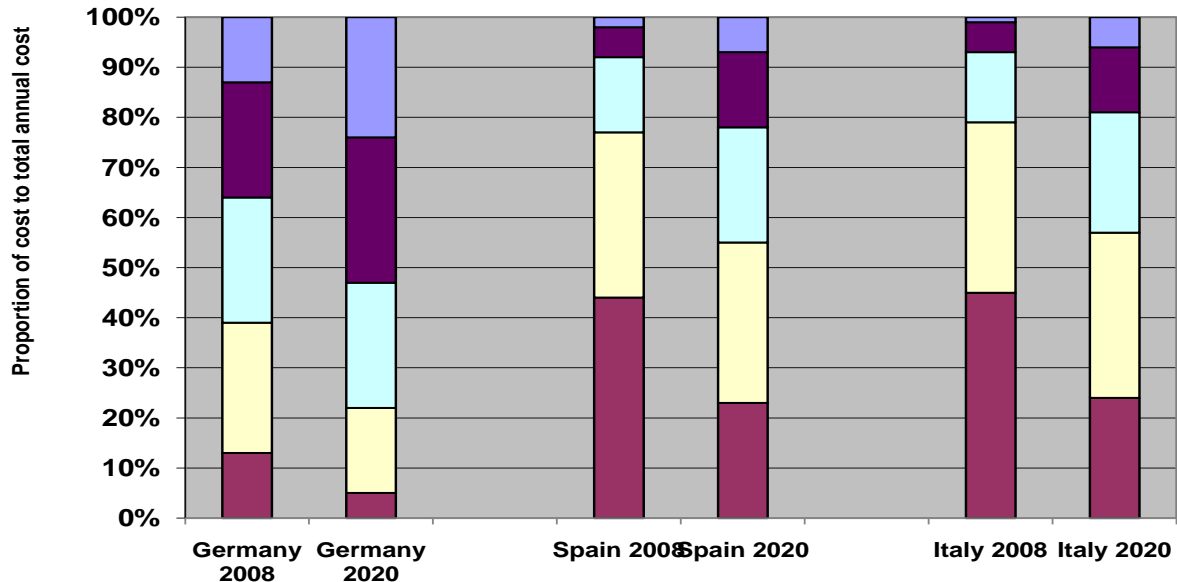

- Subjects with hypertension plus no other MetS components
- Subjects with hypertension plus one other MetS component
- Subjects with hypertension plus two other MetS components
- Subjects with hypertension plus three other MetS components
- Subjects with hypertension plus four other MetS components
